# Supplementary material for: Place of Care Trajectories in the Last Two Weeks of Life: A Population-Based Cohort Study of Ontario Decedents
Source: PubMed Central journal article supplement — J Palliat Med. 2018 Oct 29;21(11):1588–95. doi: 10.1089/jpm.2018.0049 (PMC6211822; doi:10.1089/jpm.2018.0049), 2018-10-29
Supplement: Supp_Fig2.pdf [file Supp_Fig2.pdf]

**Supplementary Figure S2: Place of care in the last two weeks of life by Income Quintile (Lowest Income Quintile N=53,492; Highest Income Quintile N=41,207)**

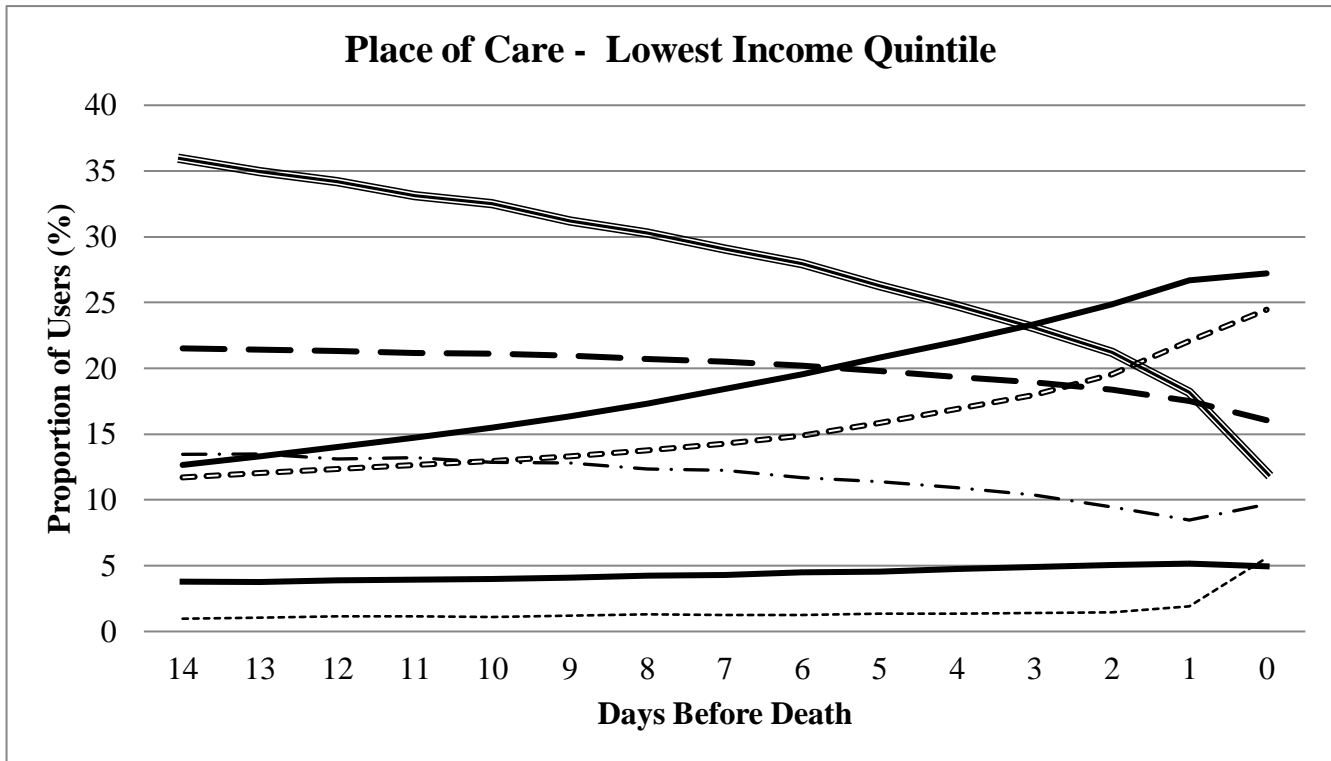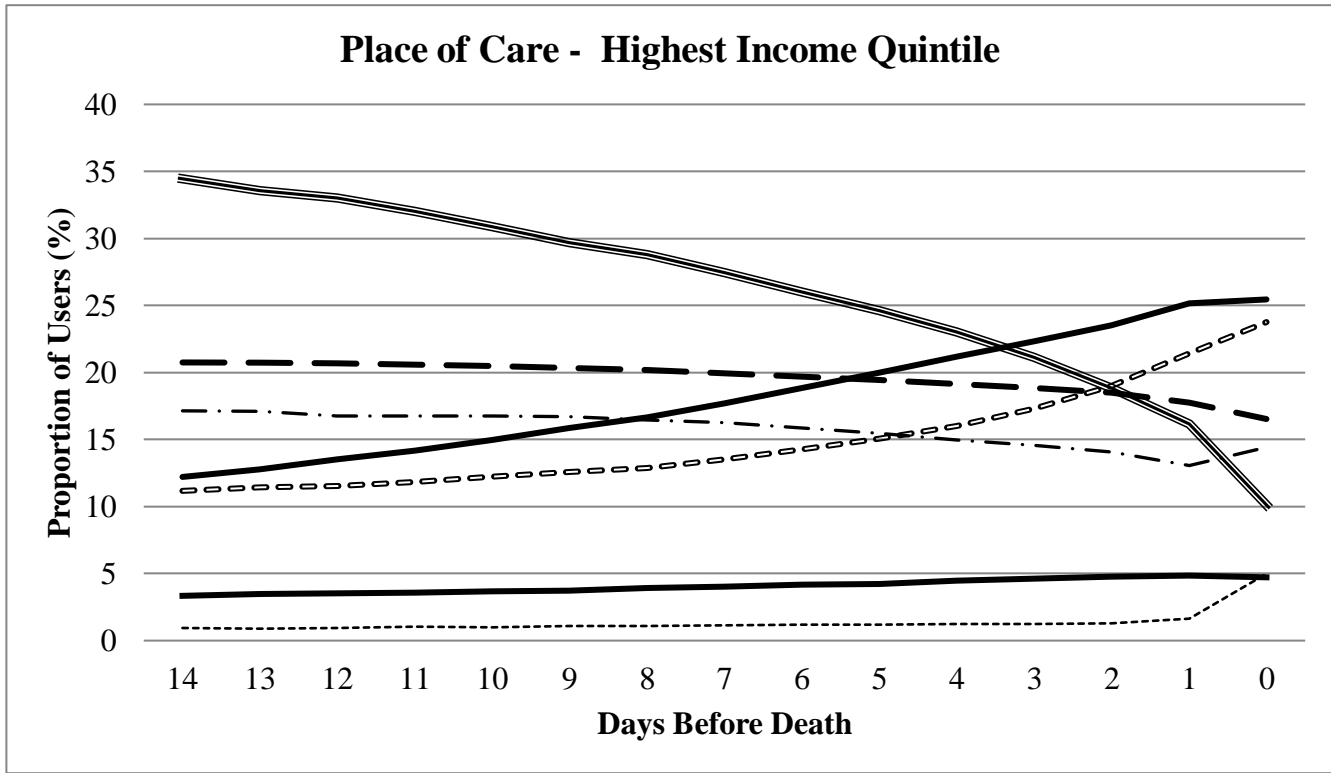

Palliative-Acute Hospital Care   
  Acute Hospital Care   
  Emergency Department  
 Complex Continuing Care   
  Long-term Care   
  Community-based Care  
 No Health Services
