# Supplementary material for: Place of Care Trajectories in the Last Two Weeks of Life: A Population-Based Cohort Study of Ontario Decedents
Source: PubMed Central journal article supplement — J Palliat Med. 2018 Oct 29;21(11):1588–95. doi: 10.1089/jpm.2018.0049 (PMC6211822; doi:10.1089/jpm.2018.0049), 2018-10-29
Supplement: Supp_Table1.pdf [file Supp_Table1.pdf]

**Supplementary Table S1: ICD-10-CA Codes used for Assigning Categories**

| <b>Category</b>         | <b>Underlying Cause of Death Code (ICD10CA)</b>                                                                                                                                                                                                                                                                                                                                                                                                                                                                                                                                                                                                                                                                                                                                                                                                                                                                                                                                                                                                                                                                                                                                                                                                                                                                                                                                                                                                                                                                |
|-------------------------|----------------------------------------------------------------------------------------------------------------------------------------------------------------------------------------------------------------------------------------------------------------------------------------------------------------------------------------------------------------------------------------------------------------------------------------------------------------------------------------------------------------------------------------------------------------------------------------------------------------------------------------------------------------------------------------------------------------------------------------------------------------------------------------------------------------------------------------------------------------------------------------------------------------------------------------------------------------------------------------------------------------------------------------------------------------------------------------------------------------------------------------------------------------------------------------------------------------------------------------------------------------------------------------------------------------------------------------------------------------------------------------------------------------------------------------------------------------------------------------------------------------|
| <b>Sudden Death</b>     | R95, R96, W03,<br>W2 – W9, W11 - W17,<br>X,<br>V,<br>Y0 - Y2, Y30 - Y36                                                                                                                                                                                                                                                                                                                                                                                                                                                                                                                                                                                                                                                                                                                                                                                                                                                                                                                                                                                                                                                                                                                                                                                                                                                                                                                                                                                                                                        |
| <b>Frailty</b>          | A02 - A04, A08, A09, A37, A48, A49,<br>B01, B02, B37, B95, B96,<br>E4, E5, E60 - E64, E86, E87, E97,<br>F00 - F03,<br>G20 - G26^, G30 - G32, G35 - G37, G81, G82,<br>I21, I25.0, I25.3, I25.4, I25.5, I25.6, I25.8, I25.9, I251, I69,<br>J00 - J06, J10 - J16, J18, J20 - J22, J69, J80,<br>K59,x<br>L89,<br>M00 - M03, M05 - M09, M11 - M19, M32 - M36, M41 - M43, M45, M46, M80 - M85, M91, M92,<br>N30,<br>R54, R63.3, R63.4                                                                                                                                                                                                                                                                                                                                                                                                                                                                                                                                                                                                                                                                                                                                                                                                                                                                                                                                                                                                                                                                                |
| <b>Terminal Illness</b> | B24,<br>C,<br>D1 - D3, D40 - D48,<br>N18                                                                                                                                                                                                                                                                                                                                                                                                                                                                                                                                                                                                                                                                                                                                                                                                                                                                                                                                                                                                                                                                                                                                                                                                                                                                                                                                                                                                                                                                       |
| <b>Organ Failure</b>    | A15 - A19, A50 - A53, A80, A81, A86 - A89,<br>B15 - B19, B90 - B94,<br>D5 - D70, D71 - D77, D80 - D84, D86, D89,<br>E00 - E07, E10 - E16, E2, E30 - E35, E65 - E68, E70 - E75.0, E75.1, E75.2, E75.3, E75.4, E75.5, E75.6, E76 - E80,<br>E83 - E85, E88,<br>F1,<br>G0, G10 - G13, G40, G41, G45 - G47, G5, G60 - G64, G70 - G73, G80, G90 - G95,<br>H0 - H8, H91 - H95,<br>I01, I05 - I13, I15, I20, I22 - I24, I25.2, I26 - I28, I3, I4, I50 - I52, I60 - I68, I70 - I74, I77 - I79, I8, I95, I97 - I99,<br>J30.0, J30.1, J30.2, J30.3, J30.4, J31.0, J31.1, J31.2, J32 - J38, J40 - J45, J47,<br>J60 - J68, J70, J81, J82, J84 - J86, J90 - J94, J96, J98, J99,<br>K0, K10 - K14, K20 - K23, K25 - K31, K35 - K38, K40 - K46, K50 - K52, K55 - K58, K60.0, K60.1, K60.2, K60.3,<br>K60.4, K60.5, K61.0, K61.1, K61.2, K61.3, K61.4, K62, K63, K65 - K67, K70 - K73, K74.0, K74.1, K74.2, K74.3,<br>K74.4, K74.5, K74.6, K75 - K77, K80 - K83, K85, K86, K90 - K93,<br>L00, L01.0, L01.1, L02 - L05, L08, L10 - L14, L20 - L27, L28.0, L28.1, L28.2, L29, L30, L40 - L45, L50 - L54, L70<br>- L74, L93.0, L93.1, L93.2, L94, L95.0, L97 - L99,<br>M10, M22 - M25, M30, M31, M47 - M49, M51, M73, M79, M86 - M90, M93, M94,<br>N00 - N08, N10 - N13, N14.0, N14.1, N14.2, N14.3, N14.4, N15 - N17, N19 - N22, N25 - N29, N31 - N33, N34.0,<br>N34.1, N34.2, N34.3, N35 - N37, N39 - N45, N47 - N51, N60 - N64, N70 - N77, N8, N90 - N96,<br>Q00 - Q07, Q10 - Q18, Q20 - Q28, Q3, Q40 - Q45, Q50 - Q56, Q6 - Q9 |
| <b>Other</b>            | A00, A01, A05 - A07, A20 - A28, A30 - A36, A38 - A44, A46, A54 - A60, A63 - A71, A74 - A79, A82, A85, A91 -<br>A99,<br>B00, B03 - B09, B25 - B27, B30, B33 - B36, B38, B39, B4 - B7, B80 - B83, B85 - B89, B97, B99,<br>F04 - F07, F09, F20 - F25, F28 - F34, F38 - F45, F48, F50 - F55, F59, F6 - F9,<br>G43, G83, G96 - G99,<br>I00, I02,<br>J17, J39, J95,<br>K91,<br>L55 - L68, L80 - L88, L90 - L92,<br>M20, M21, M40, M50, M53, M54, M60 - M63, M65 - M68, M70 - M72, M75 - M77, M95, M96, M99,<br>N46, N97 - N99,<br>O00 - O08, O10 - O16, O21 - O26, O28 - O36, O40 - O48, O6, O70 - O75, O8, O90 - O92, O95 - O99,<br>P00 - P08, P10 - P15, P2, P35 - P39, P5, P60, P61, P70 - P78, P80 - P83,<br>P90 - P96,<br>R0, R1, R20 - R23, R25 - R29, R3, R4, R50 - R53, R55 - R69, R7, R8, R90 - R94, R98, R99,<br>W00 - W02, W04 - W10, W18, W19,<br>Y4 - Y9                                                                                                                                                                                                                                                                                                                                                                                                                                                                                                                                                                                                                                                |
